# Supplementary material for: Specific MRI Abnormalities Reveal Severe Perrault Syndrome due to CLPP Defects
Source: PubMed Central journal article supplement (PMC5110515; doi:10.3389/fneur.2016.00203), 2016-11-16
Supplement: data_sheet_1.pdf [file data_sheet_1.pdf]

## SUPPLEMENTARY

**Table S1: Primers used for Sanger sequencing and real-time qPCR**

### A. Primers for *CLPP* Sanger sequencing

| Covered exon    | Forward primer (M13 tailed)                   | Reverse primer (M13 tailed)                  |
|-----------------|-----------------------------------------------|----------------------------------------------|
| CLPP exon 1 + 2 | 5'-TGTA AACGACGGCCAGTGAAGCTGTAGTTCCGCCATC-3'  | 5'-CAGGAAACAGCTATGACCGAGTCAGAAGGGGAGGGAAG-3' |
| CLPP exon 3     | 5'-TGTA AACGACGGCCAGTCCCAGCCTCCCTAAAACCTC-3'  | 5'-CAGGAAACAGCTATGACCTCTGGTCCCCTGAGTCACC-3'  |
| CLPP exon 4     | 5'-TGTA AACGACGGCCAGTCTCCCCAGGTTTAGGAGAT-3'   | 5'-CAGGAAACAGCTATGACCGCCAGTCAGTCCCTTCTGTC-3' |
| CLPP exon 5     | 5'-TGTA AACGACGGCCAGTCCCTGTGAGGGGCTGAC-3'     | 5'-CAGGAAACAGCTATGACCGGAGAAGCCCTGGCTTAGAG-3' |
| CLPP exon 6     | 5'-TGTA AACGACGGCCAGTAAACATTACAGCCAAAACAGG-3' | 5'-CAGGAAACAGCTATGACCGTCTGGCAGGCCTCTGG-3'    |

### B. Primers for quantifying *CLPP* mRNA expression by real-time qPCR

| Gene/exon                 | Forward primer             | Reverse primer               |
|---------------------------|----------------------------|------------------------------|
| CLPP exon 2 + 3 (5' side) | 5'-GCGCGCCTATGACATCTACT-3' | 5'-AGAGGAGCTGTGCGATAACAA-3'  |
| CLPP exon 5 + 6 (3' side) | 5'-CCATCCAGGCAGAGGAGA-3'   | 5'-AGGGTGGACCAGAACCTTG-3'    |
| TBP exon 5 + 6            | 5'-CACGAACCACGGCACTGATT-3' | 5'-TTTTCTTGCTGCCAGTCTGGAC-3' |

### C. Primers for mtDNA and *CLPP* copy-number determination by qPCR

| Gene/exon    | Forward primer                 | Reverse primer               |
|--------------|--------------------------------|------------------------------|
| ND5 (mtDNA)  | 5'-GCCTTCTCCACTTCAAGTCAA-3'    | 5'-TGGGTACAGATGTGCAGGAAT-3'  |
| B2M (nDNA)   | 5'-TGCTGTCTCCATGTTGATGTATCT-3' | 5'-TCTCTGCTCCCCACCTCTAAGT-3' |
| CLPP exon 3  | 5'-GCCTAAATTCTCCCATCC-3'       | 5'-AGAGGAGCTGTGCGATAACAA-3'  |
| CLPP exon 4A | 5'-CCTCCCAGGTTTAGGAGAT-3'      | 5'-TTGAGGATGTACTGCATCGTG-3'  |
| CLPP exon 4B | 5'-ATGGGCTCCCTGCTTCTC-3'       | 5'-GCCAGTCAGTCCCTTCTGTC-3'   |
| CLPP exon 6  | 5'-AACATTACAGCCAAAACAGA-3'     | 5'-AGGGTGGACCAGAACCTTG-3'    |

**Table S2: Clinical findings**

| Patient                                   | Patient 1.1                                                                                                                    | Patient 1.2                                                                                                        | Patient 2                                                                                                                                                                          | Patient 3.1                                                                                                                                                                                                     | Patient 3.2                                                                                                                                                     |
|-------------------------------------------|--------------------------------------------------------------------------------------------------------------------------------|--------------------------------------------------------------------------------------------------------------------|------------------------------------------------------------------------------------------------------------------------------------------------------------------------------------|-----------------------------------------------------------------------------------------------------------------------------------------------------------------------------------------------------------------|-----------------------------------------------------------------------------------------------------------------------------------------------------------------|
| Year of birth                             | 1995                                                                                                                           | 1993                                                                                                               | 1994                                                                                                                                                                               | 1989                                                                                                                                                                                                            | 1994                                                                                                                                                            |
| <b>Patient and family characteristics</b> |                                                                                                                                |                                                                                                                    |                                                                                                                                                                                    |                                                                                                                                                                                                                 |                                                                                                                                                                 |
| Gender                                    | Male                                                                                                                           | Male                                                                                                               | Male                                                                                                                                                                               | Male                                                                                                                                                                                                            | Male                                                                                                                                                            |
| Siblings (affected/unaffected)            | 1 (pat.1.2) / 1                                                                                                                | 1 (pat.1.1) / 1                                                                                                    | 0/1                                                                                                                                                                                | 1 (pat.3.2) / 1                                                                                                                                                                                                 | 1 (pat.3.1) / 1                                                                                                                                                 |
| Consanguinity of the parents              | Yes, full cousins                                                                                                              | Yes, full cousins                                                                                                  | Not known                                                                                                                                                                          | Not known                                                                                                                                                                                                       | Not known                                                                                                                                                       |
| <b>History</b>                            |                                                                                                                                |                                                                                                                    |                                                                                                                                                                                    |                                                                                                                                                                                                                 |                                                                                                                                                                 |
| Pregnancy/delivery                        | Premature                                                                                                                      | NI/breech delivery                                                                                                 | NI                                                                                                                                                                                 | Premature                                                                                                                                                                                                       | NI                                                                                                                                                              |
| Neonatal period                           | Feeding problems                                                                                                               | Feeding problems                                                                                                   | Irritable                                                                                                                                                                          | No information                                                                                                                                                                                                  | NI                                                                                                                                                              |
| Initial psychomotor development           | Delayed                                                                                                                        | Delayed                                                                                                            | Delayed                                                                                                                                                                            | Delayed                                                                                                                                                                                                         | NI                                                                                                                                                              |
| Unsupported walking (years)               | 14 months                                                                                                                      | 14 months                                                                                                          | 15 months                                                                                                                                                                          | Unknown                                                                                                                                                                                                         | 16 months                                                                                                                                                       |
| Highest motor milestone                   | Walking without support                                                                                                        | Walking without support                                                                                            | Walking without support, riding bike with training wheels                                                                                                                          | Walking without support                                                                                                                                                                                         | Walking without support                                                                                                                                         |
| <b>Clinical picture</b>                   |                                                                                                                                |                                                                                                                    |                                                                                                                                                                                    |                                                                                                                                                                                                                 |                                                                                                                                                                 |
| Age at presentation                       | 1 year                                                                                                                         | 16 mths                                                                                                            | 1 year                                                                                                                                                                             | 4 years                                                                                                                                                                                                         | 3 years                                                                                                                                                         |
| Clinical signs                            | Congenital deafness, psychomotor retardation, autism, behavioral problems, epilepsy, height and weight < 2SD hernia inguinalis | Deafness from 16 months, psychomotor retardation, autism, behavioral problems, stunted growth, height/ weight <p3, | Deafness noted at age 1 year; mild retardation of initial psychomotor development; stunted growth; developed epilepsy and ataxia at age 3; sensorimotor neuropathy noted at age 16 | Deafness without speech development; psychomotor retardation; spastic diplegia; microcephaly, stunted growth; developed epilepsy (photosensitive myoclonic absences) at 11 years; diabetes mellitus at 20 years | Deafness without speech development; psychomotor retardation; spastic diplegia; microcephaly, stunted growth; no epilepsy and EEG NI; at 20 years hypothyreosis |
| Disease course                            | Slow decline                                                                                                                   | Slow decline                                                                                                       | Slow decline, additional episodes of steep decline following illness or stress                                                                                                     | Slow decline                                                                                                                                                                                                    | Slow decline                                                                                                                                                    |
| Episodes of regression / number           | Yes / multiple                                                                                                                 | Yes / multiple                                                                                                     | Yes, more than ten                                                                                                                                                                 | Not observed                                                                                                                                                                                                    | One                                                                                                                                                             |
| Provoking factors                         | Febrile illness                                                                                                                | Viral infections                                                                                                   | Viral infection, puberty                                                                                                                                                           | -                                                                                                                                                                                                               | None identified                                                                                                                                                 |
| Improvement after regression              | Yes                                                                                                                            | Yes, but never back to baseline                                                                                    | Yes, but never back to baseline                                                                                                                                                    | -                                                                                                                                                                                                               | Yes                                                                                                                                                             |
| Present status                            | Wheelchair bound, loss of cognitive skills, uses sign language, swallowing problems                                            | Wheelchair bound, loss of cognitive skills, uses sign language, swallowing problems                                | Wheelchair bound, also loss of fine motor and cognitive skills; uses sign language; GMFCS level V                                                                                  | Wheelchair bound GMFCS level V                                                                                                                                                                                  | Wheelchair bound GMFCS level IV                                                                                                                                 |

| Patient number              | Patient 1.1                                 | Patient 1.2                                                  | Patient 2                                        | Patient 3.1                                               | Patient 3.2                                           |
|-----------------------------|---------------------------------------------|--------------------------------------------------------------|--------------------------------------------------|-----------------------------------------------------------|-------------------------------------------------------|
| Year of birth               | 1995                                        | 1993                                                         | 1994                                             | 1989                                                      | 1994                                                  |
| <b>Physical examination</b> |                                             |                                                              |                                                  |                                                           |                                                       |
| Age at latest exam (years)  | 20 years                                    | 22 years                                                     | 20 years                                         | 25 years                                                  | 21 years                                              |
| Dysmorphic features         | Midface hypoplasia, thick lips              | Coarse facies, hirsutism, diastasis recti, broad short hands | No                                               | Broad face, thick lips, acanthosis nigricans              | Broad face, thick lips, acanthosis nigricans          |
| Head circumference          | < P3                                        | P 10                                                         | NI, 58cm                                         | P10                                                       | P10                                                   |
| Height / weight             | <P3 (1.59m) / <P3 50.5 kg)                  | <p3 (1.60m), <P3 58 kg)                                      | <P3 / <P3                                        | <P3 / P25                                                 | <P3 / P50                                             |
| Internal organs             | NI                                          | NI                                                           | NI                                               | NI                                                        | NI                                                    |
| Intelligence                | Impaired                                    | Impaired (IQ 50-55)                                          | Impaired                                         | Impaired                                                  | Impaired                                              |
| Vision                      | 0.1                                         | 0.5 ri , 0.6 left                                            | NI                                               | Myopia                                                    | NI                                                    |
| Fundoscopy                  | NI                                          | NI                                                           | NI                                               | NI                                                        | NI                                                    |
| Eye movements               | NI                                          | NI                                                           | NI                                               | Strabism                                                  | NI                                                    |
| Nystagmus                   | No                                          | NI                                                           | NI                                               | No                                                        | No                                                    |
| Ptosis                      | No                                          | NI                                                           | NI                                               | No                                                        | No                                                    |
| Hearing                     | Deaf ri 97 and le 90db)                     | Deaf 108db ri and 103 db le                                  | Deaf                                             | Deaf                                                      | Deaf                                                  |
| Dysarthria                  | Severe                                      | Severe                                                       | Severe                                           | Severe                                                    | Severe                                                |
| Dysphagia, tube feeding     | Yes/ no                                     | Yes, no                                                      | Occasional, no tube                              | No                                                        | No                                                    |
| <b>Arms</b>                 |                                             |                                                              |                                                  |                                                           |                                                       |
| Tone                        | Increased                                   | Increased                                                    | NI                                               | Increased                                                 | Increased                                             |
| Reflexes                    | Brisk                                       | Brisk                                                        | NI                                               | Brisk                                                     | Brisk                                                 |
| Muscle strength             | Wheelchair bound                            | Generalized paresis                                          | NI                                               | NI                                                        | NI                                                    |
| Spasticity                  | Yes                                         | Yes                                                          | NI                                               | Yes, severe                                               | Yes, severe                                           |
| Ataxia                      | Yes, intention tremor, tremor head and neck | Yes, intention tremor, tremor head and neck                  | No                                               | Yes, dysmetria                                            | Yes, dysmetria                                        |
| Sensory function            | NI                                          | NI                                                           | NI                                               | Not tested                                                | Not tested                                            |
| Extrapyramidal signs        | Mild dystonic                               | Mild dystonic                                                | No                                               | Mildly dystonic                                           | Mildly dystonic                                       |
| <b>Legs</b>                 |                                             |                                                              |                                                  |                                                           |                                                       |
| Tone                        | Increased                                   | Increased                                                    | Increased                                        | Markedly increased                                        | Markedly increased                                    |
| Reflexes                    | Brisk - clonus                              | Brisk                                                        | Brisk                                            | Brisk                                                     | Brisk                                                 |
| Babinski signs              | +/+                                         | +/+                                                          | Not sure                                         | +/+                                                       | +/+                                                   |
| Muscle weakness             | No                                          | No                                                           | No                                               | No                                                        | No                                                    |
| Spasticity                  | +                                           | +                                                            | Yes                                              | Yes, more severe than arms                                | Yes, more severe than arms                            |
| Ataxia                      | +                                           | +                                                            | Gait ataxia, when still walking                  | No                                                        | No                                                    |
| Sensory function            | NI                                          | NI                                                           | Decreased, consistent with peripheral neuropathy | Not tested                                                | Not tested                                            |
| Extrapyramidal signs        | Mild dystonia                               | Mild dystonia                                                | Tremor in legs                                   | Mild dystonia                                             | Mild dystonia                                         |
| Gait                        | Spastic-ataxic, uses walker and wheelchair  | Spatic-ataxic                                                | Gait ataxia, when still walking                  | Wheelchair dependent, but at transfers evident spasticity | Wheelchair dependent, but at transfers spastic-ataxic |

NI, normal; -, absent, +, present
